# Supplementary material
Source: Springer Nature journal article supplement (https://www.springermedizin.de/resource/supplementary/12887_2010_402_MOESM5_ESM.pdf/9475038)
Supplement: MOESM5 [file 9475038]

## **Definitions of attributes used to rate the indicators**

**Link to outcomes** whether measuring the indicator would lead to better outcomes including mortality, morbidity, preventing unnecessary costs of treatment, fairness in use of resources, length of hospital stay, avoidance of unnecessary practices / procedures / treatments

**Relevance** appropriateness and usefulness of the indicator in representing the clinical process or conditions;

**Reliability** of the indicator as a consistent and objective measure of performance; and

**Actionability** whether information gained from reporting the indicator could lead to real change in the area being assessed that in turn could result in improvements in patient care.

**Feasibility** (Round 2 and 3 International, Rounds 1 and 2 National) of collecting data to populate process measures: i) in current, routine settings ii) with improvement of data collection methods.

**Priority** (Round 2 and 3 International, Rounds 1 and 2 National) to be reported to the Ministry of Health as a measure of hospital care for children in all the hospitals for which this tool would be appropriate.
